# Supplementary material for: Solubility and Permeability Enhancement of Oleanolic Acid by Solid Dispersion in Poloxamers and γ-CD
Source: MDPI journal article supplement (doi:10.3390/molecules27093042), 2022-05-09
Supplement: s1 [file s1]

Article

# Solubility and Permeability Enhancement of Oleanolic Acid by Solid Dispersion in Poloxamers and $\gamma$ -CD

Chiara De Stefani <sup>1,†</sup>, Jessika Lodovichi <sup>1,†</sup>, Laura Albonetti <sup>1</sup>, Maria Cristina Salvatici <sup>2</sup>, José Carlos Quintela <sup>3</sup>, Anna Rita Bilia <sup>1</sup>, Maria Camilla Bergonzi <sup>1,\*</sup>

<sup>1</sup> Department of Chemistry, University of Florence, via U Schiff 6, 50519 Sesto Fiorentino, Florence, Italy; chiara.destefani@stud.unifi.it (C.D.S.); jessika.lodovichi@stud.unifi.it (J.L.); laura.albonetti@stud.unifi.it (L.A.); ar.bilia@unifi.it (A.R.B.)

<sup>2</sup> National Research Council (CNR), Institute of Chemistry of Organometallic Compounds (ICCOM)—Electron Microscopy Centre (Ce.M.E.), Via Madonna del Piano 10, 50019 Sesto Fiorentino, Florence, Italy; salvatici@ceme.fi.cnr.it

<sup>3</sup> NATAC BIOTECH, Electronica 7, Alcorcón, 28923 Madrid, Spain; jcquintela@natacgroup.com

\* Correspondence: mc.bergonzi@unifi.it; Tel.: +39-055-457-3678

† These authors contributed equally to this study.

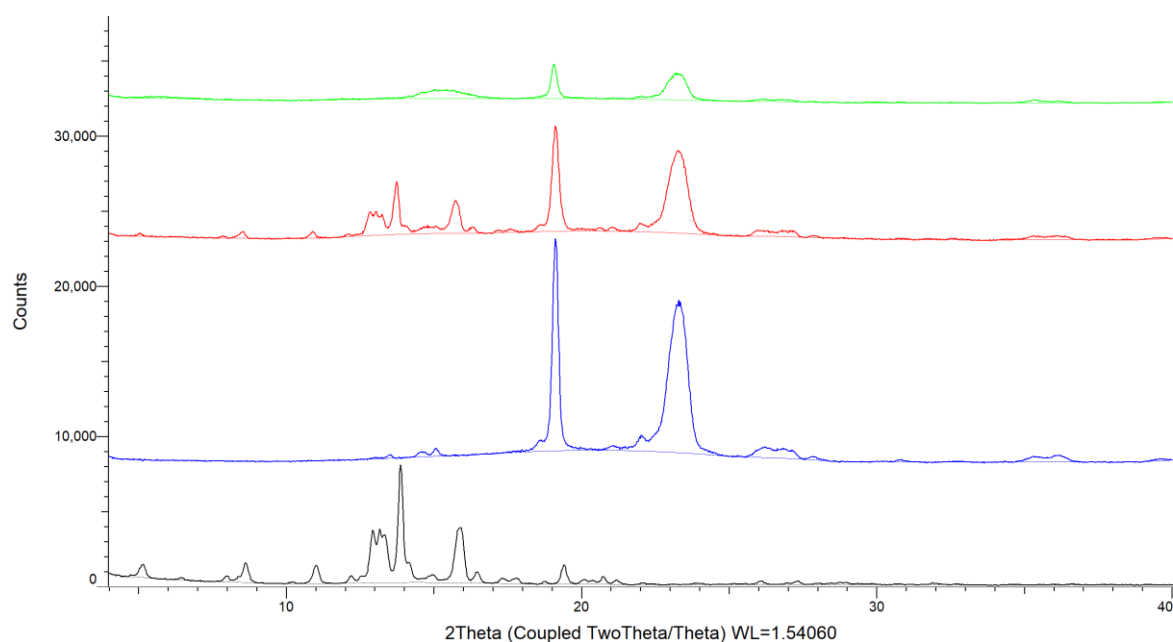

**Figure S1.** X-ray diffraction patterns of OA (black), Poloxamer 188 (blue), PM 1:2 (red) and SEM 1:2 (green).

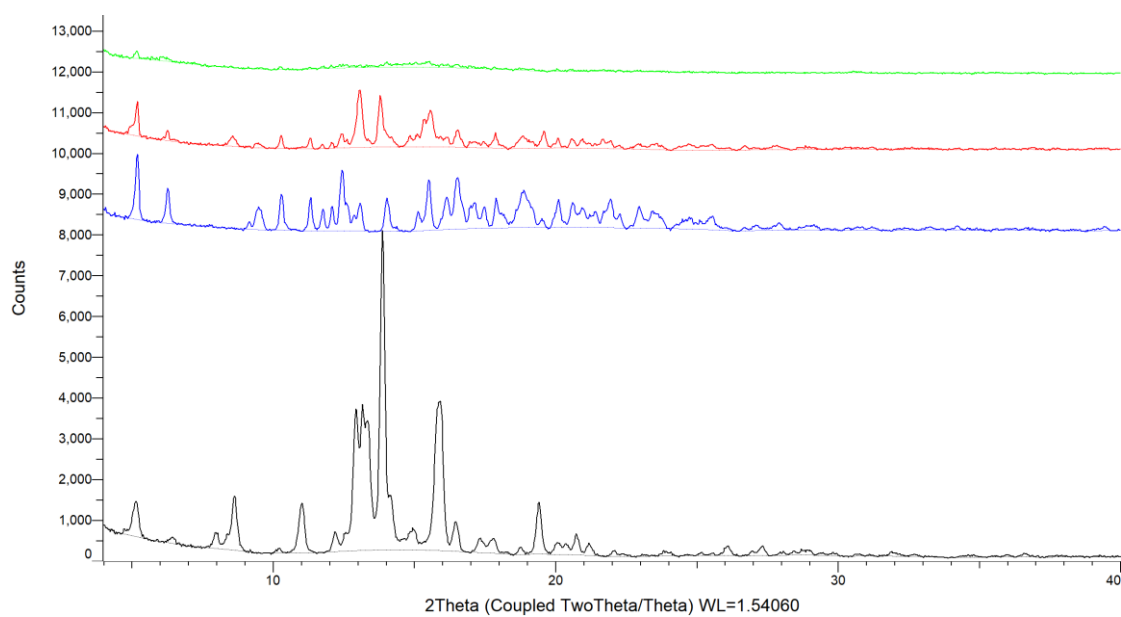

**Figure S2.** X-ray diffraction patterns of OA (black),  $\gamma$ -CD (blue), PM 1:1 (red) and SEM 1:1 (green).

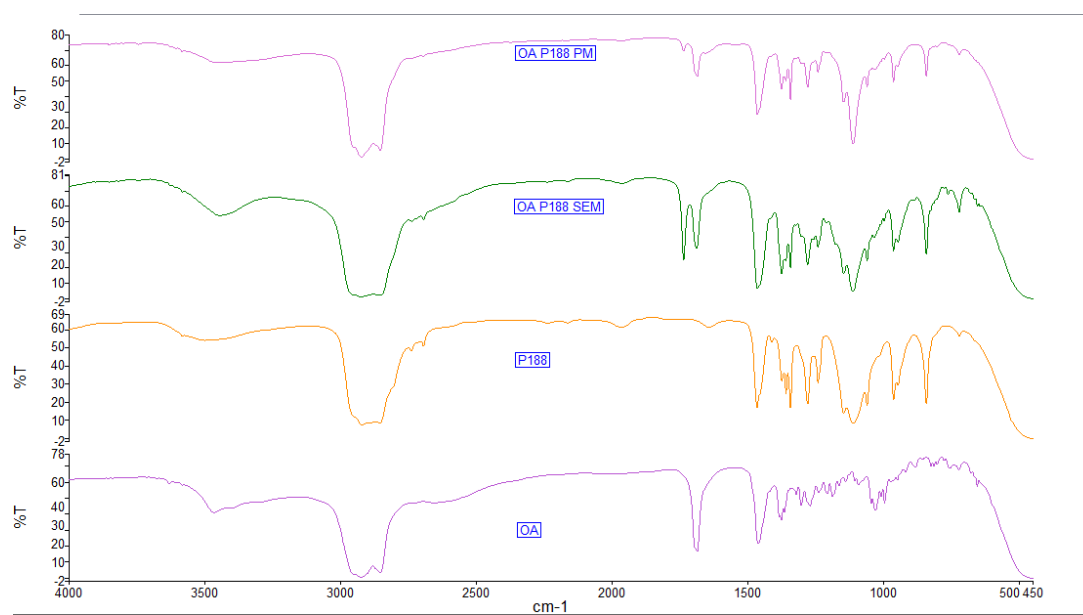

**Figure S3.** FTIR spectra of OA, P188 , physical mixture (PM), and solid dispersion (SEM).

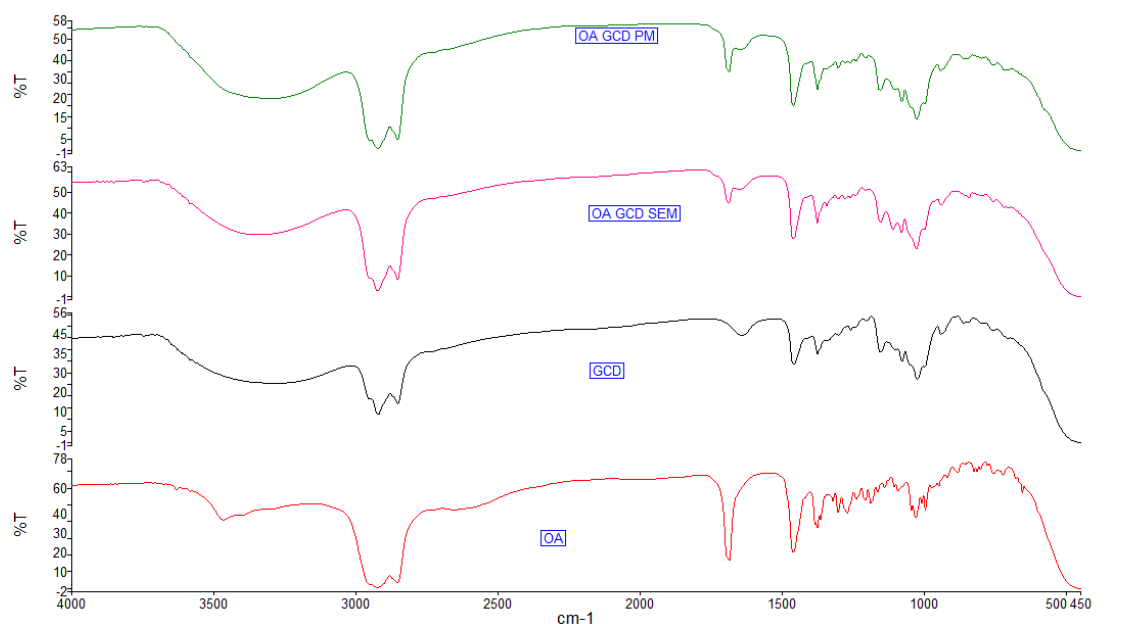

**Figure S4.** FTIR spectra of OA,  $\gamma$ -CD, physical mixture (PM), and solid dispersion (SEM).

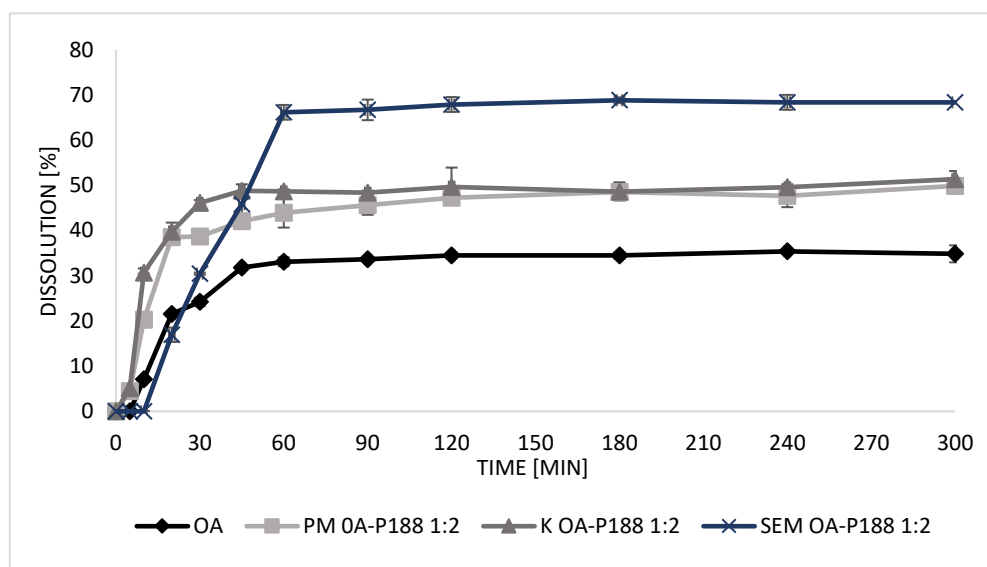

**Figure S5.** Dissolution profiles of OA, PM OA-P188 1:2, K OA-P188 1:2 and SEM OA-P188 1:2.

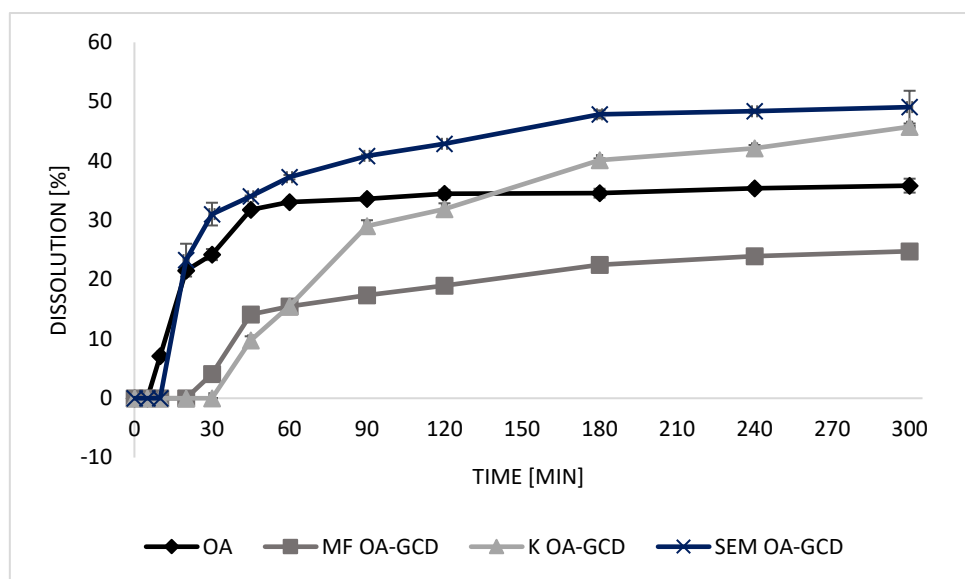

**Figure S6.** Dissolution profiles of OA, PM OA- $\gamma$ CD 1:2, K OA- $\gamma$ CD 1:2 and SEM OA- $\gamma$ CD 1:2.
